# Supplementary material for: A scandium-doped manganate anode for a proton-conducting solid oxide steam electrolyzer
Source: Royal Society of Chemistry journal article supplement (doi:10.1039/c5ra19844e), 2015-12-01

## Supporting Information

### Scandium-doped manganate anode for a proton-conducting solid oxide steam electrolyzer

Lizhen Gan,<sup>a</sup> Lingting Ye,<sup>b</sup> Mingzhou Liu,<sup>a</sup> Shanwen Tao,<sup>c</sup> Kui Xie<sup>b \*</sup>

<sup>a</sup> School of Mechanical and Automotive Engineering, Hefei University of Technology, No.193 Tunxi Road, Hefei, Anhui 230009, China.

<sup>b</sup> Key Lab of Design & Assembly of Functional Nanostructure, Fujian Institute of Research on the Structure of Matter, Chinese Academy of Sciences, Fuzhou, Fujian 350002, China.

<sup>c</sup> School of Engineering, University of Warwick, Coventry, CV4 7AL, United Kingdom.

\*Corresponding: kxie@fjirsm.ac.cn; Tel/Fax: 0086-591-63179173

**Fig.S1 Equivalent circuit diagram used to model the impedance data. The  $R_s$  is series resistance while the  $R_p$  is the electrode polarization resistance.**

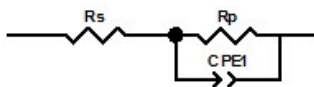

**Fig.S2 Structure and schematic of the proton conducting solid oxide electrolyser. (a) a schematic figure of a 2-mm-thick electrolyte supported single cell with a configuration of LSM-BCZY/ BCZY/ BCZY-LSCM, here the LSM-BCZY is a composite anode while the LSCM-BCZY is a composite cathode; (b) a testing schematic figure for the high temperature test for steam electrolysis, here the cell is tested in two electrode mode.**

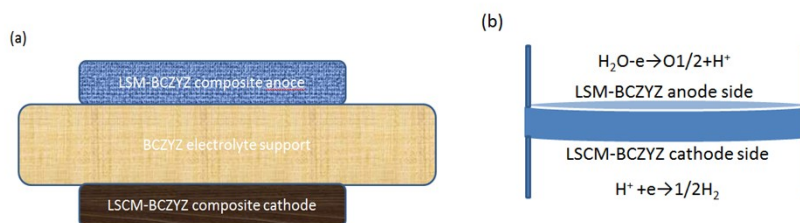

In this part, the solid oxide electrolyser is an 2-mm-thick BCZY electrolyte supported configuration. The electrode area is 1 cm<sup>2</sup> in symmetric position. The BCZY and electrode powder are in a weight ratio of 35:65. The electrode thickness is around 15 μm.

Fig.S3 HR-TEM images of LSM (a) and LSM0.05 (b).

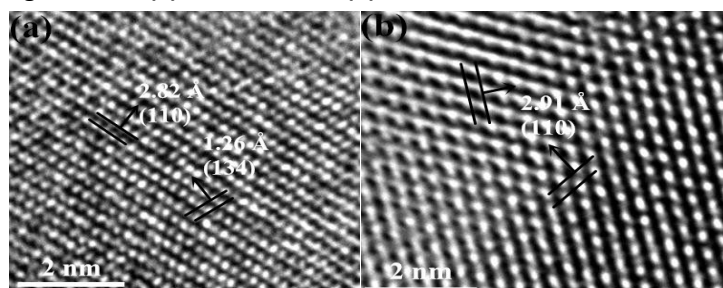

Fig. S4 (a) XPS result of Mn (a1), O (b1) in the oxidized LSM; Mn (a2), O (b2) in the reduced LSM.

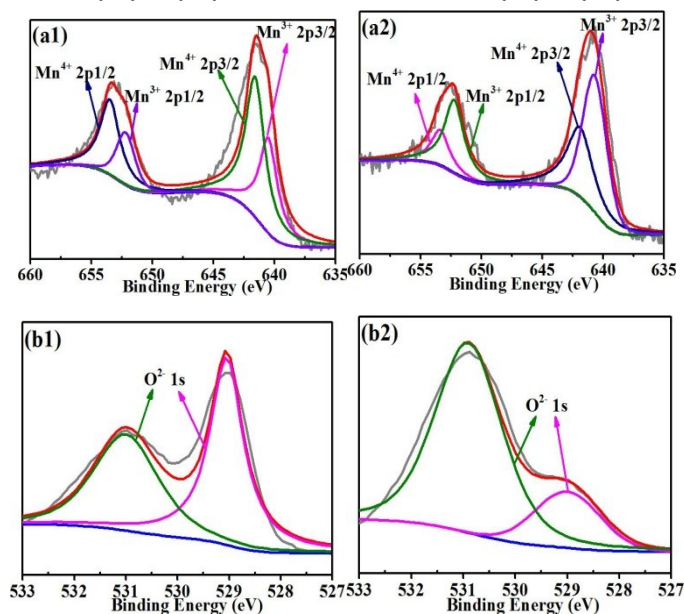

Fig.S5 The defect reactions for the doping of Sc in LSM lattice. In this work, the Mn is normally a mixed state with +4 and +3 in B site. The first reaction is for  $Mn^{3+}$  while the second is for the reaction of  $Mn^{4+}$ . If the oxygen vacancy combines with oxygen, the hole will be generated as charge carrier.

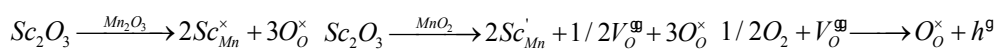

Fig.S6 TGA test of oxidized LSM (a) in 5% $H_2$ /Ar from 20 °C to 800 °C (5 °C·min<sup>-1</sup>) to determine the oxygen nonstoichiometry.

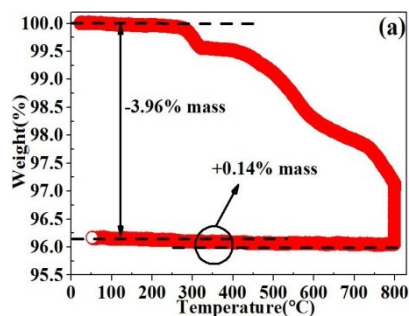

TGA is a common method to determine the nonstoichiometry of oxide materials. In this work, the  $La_{0.8}Sr_{0.2}MnO_{3-\delta}$  has assumed to be a chemical formula of  $La_{0.8}Sr_{0.2}MnO_{3.00}$  as a reference to compare

the oxygen loss. In this figure, the weight loss is 3.96% which indicates the oxygen loss. Therefore, the oxygen loss per  $\text{La}_{0.8}\text{Sr}_{0.2}\text{MnO}_{3.00}$  is  $3.96\% \times [138.9 \times 0.8 + 87.62 \times 0.2 + 54.94 \times 1 + 16.00 \times 3] / 16.00 = 0.54$

**Fig. S7** Cross sectional FESEM images of the solid oxide symmetric cell with the (a) LSM composite electrode and (b)  $\text{LSMS}_{0.05}$  composite electrode.

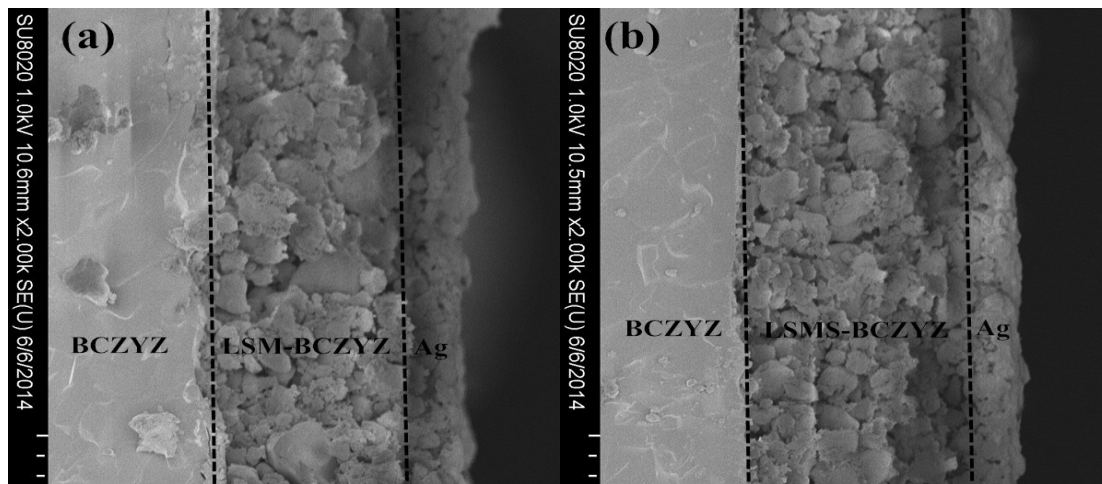

**Fig.S8** (a) The FESEM image of composite anode based on  $\text{LSMS}_{0.05}$ -BCZY in air; (b) EDS maps of composite anodes based on  $\text{LSMS}_{0.05}$ -BCZY in air.

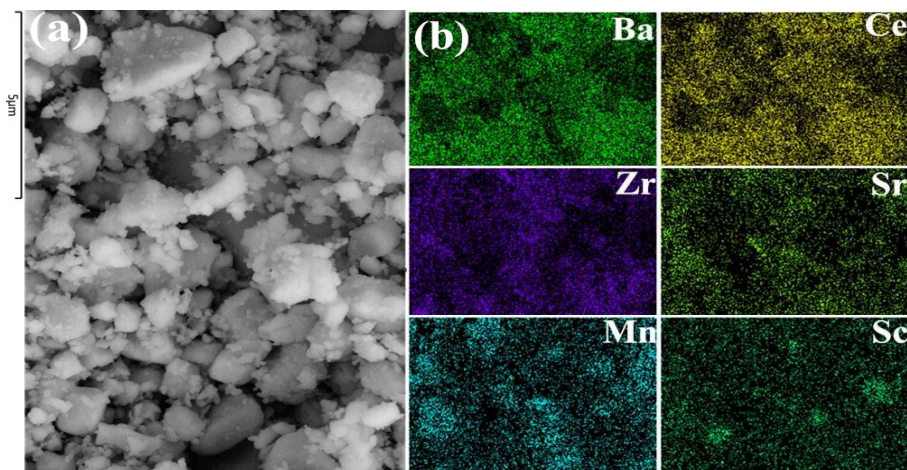

Supplement: c5ra19844e1.pdf [file c5ra19844e1.pdf]
